# Supplementary material for: Broadband solar absorption enhancement via periodic nanostructuring of electrodes
Source: PubMed Central journal article supplement (PMC3796292; doi:10.1038/srep02928), 2013-10-14
Supplement: srep02928-s1.pdf [file srep02928-s1.pdf]

# Supplementary Information for:

## Broadband solar absorption enhancement via periodic nanostructuring of electrodes

Michael M. Adachi, André J. Labelle, Susanna M. Thon, Xinzheng Lan, Sjoerd Hoogland, Edward H. Sargent

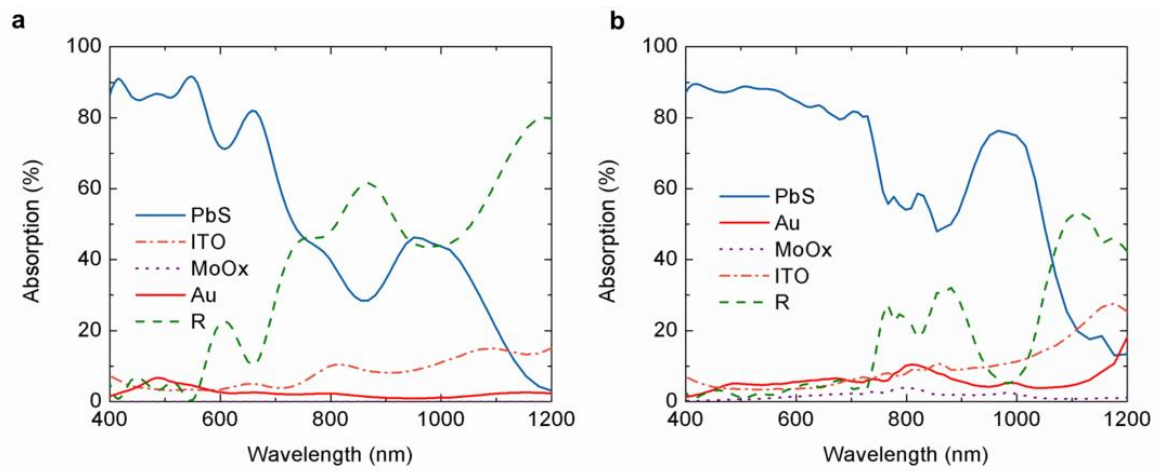

**Figure S1.** FDTD simulations of absorption by different layers (PbS, ITO, MoO<sub>3</sub>, Au) and reflectance (R) in the planar (thickness=290nm) device (a) and the structured device (b) shown in Figure 1a.
